# Supplementary material for: Assessment of prokaryotic communities in Southwestern Atlantic deep-sea sediments reveals prevalent methanol-oxidising Methylomirabilales
Source: PubMed Central journal article supplement (PMC10406867; doi:10.1038/s41598-023-39415-9), 2023-08-07
Supplement: 41598_2023_39415_MOESM1_ESM.pdf [file 41598_2023_39415_MOESM1_ESM.pdf]

**Supplemental Information for:**

**Assessment of prokaryotic communities in Southwestern Atlantic deep-sea sediments reveals prevalent methanol-oxidising *Methylomirabilales***

Francielli V. Peres, Fabiana S. Paula\*, Amanda G. Bedia, Júlia B. Gontijo, Michel M. de Mahiques, Vivian H. Pellizari

\*Corresponding author:

Fabiana S. Paula

E-mail address: [fabianaspaula@gmail.com](mailto:fabianaspaula@gmail.com)

Instituto Oceanográfico, Universidade de São Paulo, Praça do Oceanográfico, 191, São Paulo CEP: 05508-120, Brasil.

| <b>Supplementary Tables</b> | <b>Page</b> |
|-----------------------------|-------------|
| Supplementary Table 1       | 2           |
| Supplementary Table 2       | 3           |
| Supplementary Table 3       | 4           |
| Supplementary Table 4       | 5           |
| Supplementary Table 5       | 6           |
| Supplementary Table 6       | 9           |
| Supplementary Table 7       | 10          |
| Supplementary Table 8       | 12          |

**Tables S1.** Sampling stations studied at Santos Basin continental slope and sample metadata.

| <b>Sample ID</b> | <b>Stratum (cm)<sup>a</sup></b> | <b>Latitude</b> | <b>Longitude</b> | <b>Depth (m)<sup>b</sup></b> | <b>Site<sup>c</sup></b> |
|------------------|---------------------------------|-----------------|------------------|------------------------------|-------------------------|
| Surface_255      | 0-2                             | 26°29.677'S     | 45°58.153'W      | 652                          | Control                 |
| Subsurface_255   | 22-24                           | 26°29.677'S     | 45°58.153'W      | 652                          | Control                 |
| Surface_258      | 0-2                             | 26°15.715'S     | 45°40.97'W       | 543                          | Control                 |
| Subsurface_258   | 22-24                           | 26°15.715'S     | 45°40.97'W       | 543                          | Control                 |
| Surface_250      | 0-2                             | 26°49.590'S     | 46°24.27'W       | 433                          | Diapir                  |
| Subsurface_250   | 16-18                           | 26°49.590'S     | 46°24.27'W       | 433                          | Diapir                  |
| Surface_259      | 0-2                             | 26°33.776'S     | 46°07.008'W      | 559                          | Diapir                  |
| Subsurface_259   | 22-24                           | 26°33.776'S     | 46°07.008'W      | 559                          | Diapir                  |
| Surface_260      | 0-2                             | 26°33.710'S     | 46°07.470'W      | 517                          | Diapir                  |
| Subsurface_260   | 22-24                           | 26°33.710'S     | 46°07.470'W      | 517                          | Diapir                  |
| Surface_253      | 0-2                             | 26°14.72'S      | 45°40.97'W       | 730                          | Pockmark                |
| Subsurface_253   | 22-24                           | 26°14.72'S      | 45°40.97'W       | 730                          | Pockmark                |
| Surface_254      | 0-2                             | 26°15.715'S     | 45°42.971'W      | 747                          | Pockmark                |
| Subsurface_254   | 22-24                           | 26°15.715'S     | 45°42.971'W      | 747                          | Pockmark                |
| Surface_257      | 0-2                             | 26°32.075'S     | 46°04.822'W      | 698                          | Pockmark                |
| Subsurface_257   | 22-24                           | 26°32.075'S     | 46°04.822'W      | 698                          | Pockmark                |

<sup>a</sup> Sediment stratum (depth) selected from the core of sediment collected. Surface: 0-2 cm; Subsurface: 16-18 or 22-24 cm

<sup>b</sup> Water column depth

<sup>c</sup> Sampling site geomorphological feature

**Tables S2.** Richness and diversity of prokaryotes in surface and subsurface sediment samples.

| <b>Sample ID</b>           | <b>No. of Sequences</b> | <b>Observed ASV</b> | <b>Chao1</b>             | <b>Shannon</b>       |
|----------------------------|-------------------------|---------------------|--------------------------|----------------------|
| <b>Control Surface</b>     |                         |                     |                          |                      |
| Surface 255                | 25.853                  | 744                 | 776.354                  | 6.136                |
| Surface 258                | 49.839                  | 1.094               | 1214.839                 | 6.449                |
| <i>Sum</i>                 | <i>75692</i>            | <i>1.838</i>        | <i>1991.193</i>          | <i>12.585</i>        |
| <i>Mean ± SD</i>           | <i>37.846 ± 11.99</i>   | <i>919 ± 175</i>    | <i>995.59 ± 219.24</i>   | <i>6.292 ± 0.156</i> |
| <b>Control Subsurface</b>  |                         |                     |                          |                      |
| Subsurface 255             | 39.456                  | 1.176               | 1320.460                 | 6.574                |
| Subsurface 258             | 64.296                  | 816                 | 932.575                  | 5.632                |
| <i>Sum</i>                 | <i>103.752</i>          | <i>1.992</i>        | <i>3.277.522</i>         | <i>12.206</i>        |
| <i>Mean ± SD</i>           | <i>51.976 ± 12.42</i>   | <i>996 ± 180</i>    | <i>1321.393 ± 659.76</i> | <i>6.103 ± 0.471</i> |
| <b>Diapir Surface</b>      |                         |                     |                          |                      |
| Surface 250                | 48.861                  | 1.181               | 1288.013                 | 6.548                |
| Surface 259                | 38.970                  | 921                 | 971.281                  | 6.247                |
| Surface 260                | 36.265                  | 999                 | 1079.577                 | 6.419                |
| <i>Sum</i>                 | <i>124.096</i>          | <i>3.101</i>        | <i>3338.871</i>          | <i>19.214</i>        |
| <i>Mean ± SD</i>           | <i>38.97 ± 5.41</i>     | <i>999 ± 108.93</i> | <i>1079.577 ± 131.44</i> | <i>6.419 ± 0.123</i> |
| <b>Diapir Subsurface</b>   |                         |                     |                          |                      |
| Subsurface 250             | 42.091                  | 1193                | 1348.472                 | 6.537                |
| Subsurface 259             | 32.897                  | 917                 | 992.607                  | 6.224                |
| Subsurface 260             | 38.272                  | 721                 | 790.538                  | 5.785                |
| <i>Sum</i>                 | <i>113.260</i>          | <i>2831</i>         | <i>3131617</i>           | <i>18.546</i>        |
| <i>Mean ± SD</i>           | <i>38.272 ± 3.77</i>    | <i>917 ± 193.64</i> | <i>992.607 ± 230.64</i>  | <i>6.22 ± 0.308</i>  |
| <b>Pockmark Surface</b>    |                         |                     |                          |                      |
| Surface 253                | 23.675                  | 708                 | 724.5541                 | 6.158                |
| Surface 254                | 6.972                   | 292                 | 293.500                  | 5.292                |
| Surface 257                | 38.816                  | 932                 | 1001.227                 | 6.262                |
| <i>Sum</i>                 | <i>69.463</i>           | <i>1932</i>         | <i>1294.727</i>          | <i>11.554</i>        |
| <i>Mean ± SD</i>           | <i>23.67 ± 13.0</i>     | <i>708 ± 265.16</i> | <i>1001.227 ± 3123.8</i> | <i>6.15 ± 0.434</i>  |
| <b>Pockmark Subsurface</b> |                         |                     |                          |                      |
| Subsurface 253             | 28.379                  | 952                 | 724.554                  | 6.158                |
| Subsurface 254             | 20.535                  | 822                 | 844.557                  | 6.299                |
| Subsurface 257             | 38.673                  | 1.186               | 1295.572                 | 6.556                |
| <i>Sum</i>                 | <i>87.587</i>           | <i>2.960</i>        | <i>2864.683</i>          | <i>19.013</i>        |
| <i>Mean ± SD</i>           | <i>28.379 ± 7.427</i>   | <i>952 ± 150.61</i> | <i>844.557 ± 245.82</i>  | <i>6.299 ± 0.164</i> |

**Table S3.** Two-way ANOVA statistics evaluating the effects of strata and site on Chao1 and Shannon diversity indexes.

| <b>Chao1</b>                   | <b>SS</b>  | <b>df</b> | <b>MS</b> | <b>F</b> | <b>P</b> |
|--------------------------------|------------|-----------|-----------|----------|----------|
| (stratum) Surface:Subsurface   | 52896.80   | 1         | 52896.80  | 0.70     | 0.4206   |
| (site) Control:Diapir:Pockmark | 250570.95  | 2         | 125285.48 | 1.67     | 0.2326   |
| stratum x site                 | 84649.68   | 2         | 42324.84  | 0.56     | 0.5867   |
| Error                          | 825423.66  | 11        | 75038.51  |          |          |
| Total                          | 1213541.09 | 16        |           |          |          |
| <b>Shannon</b>                 | <b>SS</b>  | <b>df</b> | <b>MS</b> | <b>F</b> | <b>P</b> |
| (stratum) Surface:Subsurface   | 0.01       | 1         | 0.01      | 0.07     | 0.7962   |
| (site) Control:Diapir:Pockmark | 0.15       | 2         | 0.08      | 0.50     | 0.6197   |
| stratum x site                 | 0.50       | 2         | 0.25      | 1.67     | 0.2326   |
| Error                          | 1.65       | 11        | 0.15      |          |          |
| Total                          | 2.31       | 1         |           |          |          |

Site= Control, Diapir and Pockmark. Strata= Surface (0-2cm) and Subsurface (16-18cm or 22-24cm)

**Table S4.** Permutational analysis of variance (PERMANOVA) evaluating the effects of site and strata on community composition.

| Factor      | Df | SumsOfSqs | MeanSqs | F.Model | R <sup>2</sup> | P value |
|-------------|----|-----------|---------|---------|----------------|---------|
| Site        | 2  | 0.6665    | 0.33324 | 1.1750  | 0.11858        | 0.231   |
| Strata      | 1  | 1.5204    | 1.52044 | 5.3611  | 0.27052        | 0.001   |
| Site:Strata | 2  | 0.5975    | 0.29875 | 1.0534  | 0.10631        | 0.360   |
| Residuals   | 10 | 2.8361    | 0.28361 | 0.50459 | 0.35164        |         |
| Total       | 15 | 5.6205    |         |         | 1.00000        |         |

Site= Control, Diapir and Pockmark. Strata= Surface (0-2cm) and Subsurface (16-18cm or 22-24cm)

**Table S5.** Core Microbiome analysis – list of ASVs shared by all samples (central), by surface samples only, and by subsurface samples only.

| ASV ID                            | Domain   | Phyla             | Class               | Order               | Family              |
|-----------------------------------|----------|-------------------|---------------------|---------------------|---------------------|
| <b>Central Core Microbiome</b>    |          |                   |                     |                     |                     |
| 88ece184badcd461a1c452b9168238dd  | Bacteria | Proteobacteria    | Alphaproteobacteria | Rhizobiales         | Hyphomicrobiaceae   |
| d42457886a830872cbbecf93f40e7b7d  | Bacteria | Methylomirabilota | Methylomirabilia    | Methylomirabiales   | Methylomirabilaceae |
| <b>Surface Core Microbiome</b>    |          |                   |                     |                     |                     |
| 04013e82bfa1a8727a8d9230ad85f757  | Bacteria | Proteobacteria    | Alphaproteobacteria | Kiloniellales       | Kiloniellaceae      |
| 0498ad663b7f79af564bbd917becf6a4  | Archaea  | Crenarchaeota     | Nitrososphaeria     | Nitrosopumilales    | Nitrosopumilaceae   |
| 07f4ec67a67b6e689a8b1f3bc7043e83  | Bacteria | Proteobacteria    | Alphaproteobacteria | uncultured          | uncultured          |
| 0b678d1f0f13f61e6383bb6e0948c798  | Bacteria | Dadabacteria      | Dadabacteriia       | Dadabacteriales     | Dadabacteriales     |
| 10b767aa94756f5887aeb2cb7fc9f2f4  | Bacteria | Gemmatimonadota   | PAUC43f             | PAUC43f             | PAUC43f             |
| 140a6b70a72fcedca42dad6d25f5fd98  | Bacteria | Proteobacteria    | Gammaproteobacteria | AT-s2-59            | AT-s2-59            |
| 1c1edb73165695a5bd9ca622dc2b711f  | Archaea  | Crenarchaeota     | Nitrososphaeria     | Nitrosopumilales    | Nitrosopumilaceae   |
| 1d1d67547136a33fcdfcd306f5702f6e  | Bacteria | Proteobacteria    | Alphaproteobacteria | Kiloniellales       | Kiloniellaceae      |
| 20c3f85fb8a8652ec8b1330d433aed32  | Bacteria | Proteobacteria    | Alphaproteobacteria | Kiloniellales       | Kiloniellaceae      |
| 21ace7371bd6993fc047f6187e925dbf  | Bacteria | Proteobacteria    | Alphaproteobacteria | Rhizobiales         | Methyloligellaceae  |
| 25733a39b1dfa679b2d0712dff87f258  | Bacteria | Proteobacteria    | Gammaproteobacteria | MBMPE27             | MBMPE27             |
| 2b78b7292871cab7dd6e4ab1518ef6a3  | Bacteria | NB1-j             | NB1-j               | NB1-j               | NB1-j               |
| 2d2d4c698a867a06755afc4dce823452  | Bacteria | Gemmatimonadota   | BD2-11              | BD2-11              | BD2-11              |
| 2d6449d9ef1747714ad9b8242947215b  | Bacteria | Proteobacteria    | Gammaproteobacteria | MBMPE27             | MBMPE27             |
| 2e48c01cef7f4daf8c36285a101c0197  | Bacteria | Proteobacteria    | Alphaproteobacteria | -                   | -                   |
| 2f898363289df017eb456cd4434e976e  | Bacteria | Dadabacteria      | Dadabacteriia       | Dadabacteriales     | Dadabacteriales     |
| 30d230e4e00057dfdf4adde04627529d  | Bacteria | Proteobacteria    | Gammaproteobacteria | Oceanospirillales   | Nitrincolaceae      |
| 33885eacff84739fdf59109d9a30c4143 | Bacteria | Proteobacteria    | Alphaproteobacteria | -                   | -                   |
| 33df8b69f75f0e4b605028dbfc54ea96  | Archaea  | Crenarchaeota     | Nitrososphaeria     | Nitrosopumilales    | Nitrosopumilaceae   |
| 34bb86368caea06b45a8f23fea1dbc5c  | Archaea  | Crenarchaeota     | Nitrososphaeria     | Nitrosopumilales    | Nitrosopumilaceae   |
| 3f1bc0782561cd249c71637d97a7738f  | Archaea  | Crenarchaeota     | Nitrososphaeria     | Nitrosopumilales    | Nitrosopumilaceae   |
| 41a20373352d33616e961818dbb179e5  | Bacteria | Proteobacteria    | Gammaproteobacteria | Nitrosococcales     | Nitrosococcaceae    |
| 4436051b8caa9b2f2ea3bdacd1afdeb9  | Bacteria | Proteobacteria    | Gammaproteobacteria | Steroidobacteriales | Woeseiaceae         |
| 45ff6775638a7dc8be1a596605555d2   | Archaea  | Crenarchaeota     | Nitrososphaeria     | Nitrosopumilales    | Nitrosopumilaceae   |
| 471f8559df7c30dbc2b2d0a0aed68ed   | Bacteria | Nitrospirota      | Nitrospira          | Nitrospirales       | Nitrospiraceae      |
| 4c16b55eded3ba039f6662cc72e63f6   | Bacteria | Proteobacteria    | Alphaproteobacteria | -                   | -                   |

| <b>Table S5 – continuation</b>   |               |                 |                     |                     |                    |
|----------------------------------|---------------|-----------------|---------------------|---------------------|--------------------|
| <b>ASV ID</b>                    | <b>Domain</b> | <b>Phyla</b>    | <b>Class</b>        | <b>Order</b>        | <b>Family</b>      |
| 502c02860f623e5ff8795422903cbfde | Bacteria      | Acidobacteriota | Vicinamibacteria    | Vicinamibacterales  | uncultured         |
| 56bbc504d74551cd72635d16d0bac851 | Bacteria      | Proteobacteria  | Alphaproteobacteria | Kiloniellales       | Kiloniellaceae     |
| 57c59f2ccbca5b03a1e04670dd8f0010 | Archaea       | Crenarchaeota   | Nitrososphaeria     | Nitrosopumilales    | Nitrosopumilaceae  |
| 5a304aed857826a705f0a14cefb2db9f | Bacteria      | Proteobacteria  | Gammaproteobacteria | AT-s2-59            | AT-s2-59           |
| 63e33a7d7b5a21a9df845a4a05847bc9 | Bacteria      | Gemmatimonadota | BD2                 | BD2                 | BD2                |
| 65e42fc434451815d377d184a77fe1c7 | Bacteria      | Proteobacteria  | Gammaproteobacteria | Steroidobacterales  | Woeseiaceae        |
| 68c9a3dacdbfd3b63b79cb29e6673b4b | Bacteria      | Proteobacteria  | Gammaproteobacteria | Steroidobacterales  | Woeseiaceae        |
| 6c8fe3f5b0b240007f0ffea2faeae73  | Bacteria      | Proteobacteria  | Alphaproteobacteria | Rhizobiales         | KF-JG30-B3         |
| 6fd0f2ed0e237e81dcadcbab72284bde | Bacteria      | Proteobacteria  | Alphaproteobacteria | Kiloniellales       | Kiloniellaceae     |
| 702e8b2107edfe1dbe47dba8bc5d185c | Bacteria      | Proteobacteria  | Gammaproteobacteria | Gammaproteobacteria | Unknown            |
| 7079b0bac05957134fe21be3636f405c | Bacteria      | -               | -                   | -                   | -                  |
| 739d21ef1089dd8495682f60f7727ed9 | Bacteria      | Bacteroidota    | Bacteroidia         | Cytophagales        | Cyclobacteriaceae  |
| 73a76d201ec82c666a150f6cfb7473c4 | Bacteria      | Proteobacteria  | Gammaproteobacteria | Alteromonadales     | Shewanellaceae     |
| 7485b488409ea7697e23e79766acdd86 | Bacteria      | Proteobacteria  | Gammaproteobacteria | EPR3968-O8a-Bc78    | EPR3968-O8a-Bc78   |
| 77701520d52299d7f15e2871502f1664 | Bacteria      | Planctomycetota | Pla3 lineage        | Pla3 lineage        | Pla3 lineage       |
| 7cac67fe6bbff3aeb2194c826f91f565 | Bacteria      | Proteobacteria  | Alphaproteobacteria | -                   | -                  |
| 7dcf93ffa46f9927ef6df7ab89a09613 | Bacteria      | Nitrospirota    | Nitrospira          | Nitrospirales       | Nitrospiraceae     |
| 7e7d25eb23ad32f12e195b377e4b37ba | Bacteria      | Proteobacteria  | Gammaproteobacteria | Burkholderiales     | Nitrosomonadaceae  |
| 83365de7a4bd74406238426c3e5d34d2 | Bacteria      | Proteobacteria  | Gammaproteobacteria | Nitrosococcales     | Nitrosococcaceae   |
| 850e720604e35b0e152d821aa5391dc0 | Bacteria      | Proteobacteria  | Alphaproteobacteria | Rhizobiales         | Methyloligellaceae |
| 8816d7893041e98f9cad4704883a48d8 | Bacteria      | Planctomycetota | Planctomycetes      | Pirellulales        | Pirellulaceae      |
| 8c504df61b282e1fa88491325c5e00d8 | Bacteria      | -               | -                   | -                   | -                  |
| 8cfb8c64de2d14262e2b7ba2da2b683b | Bacteria      | Proteobacteria  | Alphaproteobacteria | Kiloniellales       | Kiloniellaceae     |
| 8f4c1632a796a6609c6368164542e423 | Bacteria      | Proteobacteria  | Alphaproteobacteria | Kiloniellales       | Kiloniellaceae     |
| 8f6ed589c9351e9b5f6b0ffe9e7c100e | Bacteria      | Proteobacteria  | Alphaproteobacteria | Defluviococcales    | uncultured         |
| 9843e7cd10cfbdd58b222aa2b44c6e37 | Bacteria      | Nitrospirota    | Nitrospira          | Nitrospirales       | Nitrospiraceae     |
| 9a1c885c36a0ece622a7f8f92c07cd7d | Bacteria      | Acidobacteriota | AT-s3-28            | AT-s3-28            | AT-s3-28           |
| 9cb32e4ce15398ecb5d3c94f335eb296 | Bacteria      | NB1-j           | NB1-j               | NB1-j               | NB1-j              |
| 9e5dcea274a19a7008d2265efff2923a | Bacteria      | Proteobacteria  | Gammaproteobacteria | EPR3968-O8a-Bc78    | EPR3968-O8a-Bc78   |
| a8c2c0f8a2812df378266e804e702aa9 | Bacteria      | Proteobacteria  | Gammaproteobacteria | Gammaproteobacteria | Unknown            |

| <b>Table S5 – continuation</b>    |               |                   |                     |                     |                     |
|-----------------------------------|---------------|-------------------|---------------------|---------------------|---------------------|
| <b>ASV ID</b>                     | <b>Domain</b> | <b>Phyla</b>      | <b>Class</b>        | <b>Order</b>        | <b>Family</b>       |
| aa834f0722681701e21903fa1b9329bb  | Bacteria      | Proteobacteria    | Alphaproteobacteria | Kiloniellales       | Kiloniellaceae      |
| ab418e07af33521ba183bb4b836b5168  | Archaea       | Crenarchaeota     | Nitrososphaeria     | Nitrosopumilales    | Nitrosopumilaceae   |
| ab8701fe9bc69d2545f1d1841be43ca0  | Bacteria      | Proteobacteria    | Gammaproteobacteria | Nitrosococcales     | Nitrosococcaceae    |
| add9c0f8a87fa265a195397a8d0d58b6  | Archaea       | Crenarchaeota     | Nitrososphaeria     | Nitrosopumilales    | Nitrosopumilaceae   |
| af562fbdd67ae04b1ae167190232b522  | Bacteria      | Proteobacteria    | Alphaproteobacteria | -                   | -                   |
| b1cf9092b41e5db7ba632d91fd070bd8  | Bacteria      | Proteobacteria    | Gammaproteobacteria | Gammaproteobacteria | Unknown             |
| b713c9afb89b316e229a19441dff4d1b  | Bacteria      | Gemmatimonadota   | PAUC43f             | PAUC43f             | PAUC43f             |
| b7f91f8b2b617fadf4d321ca6eaf0313  | Bacteria      | NB1-j             | NB1-j               | NB1-j               | NB1-j               |
| b8748189b9c61925bb5f0eddb7b3e734  | Bacteria      | Gemmatimonadota   | PAUC43f             | PAUC43f             | PAUC43f             |
| bdc959f8622c41e5649e80f6989a239a  | Archaea       | Crenarchaeota     | Nitrososphaeria     | Nitrosopumilales    | Nitrosopumilaceae   |
| c1dd3fba8751fc4558951c6225bf78a9  | Bacteria      | Gemmatimonadota   | BD2-11              | BD2-11              | BD2-11              |
| c3e3dbe5247b1352b53856ff86aac1c1  | Bacteria      | Proteobacteria    | Gammaproteobacteria | MBMPE27             | MBMPE27             |
| c3eefd9de45c9afc27757e0931c955b1  | Archaea       | Crenarchaeota     | Nitrososphaeria     | Nitrosopumilales    | Nitrosopumilaceae   |
| c67a44e7c182d82abd4d193f45a00d5c  | Bacteria      | Acidobacteriota   | Subgroup 22         | Subgroup 22         | Subgroup 22         |
| c8d97f24b030206f07d1c54b2a631393  | Bacteria      | NB1-j             | NB1-j               | NB1-j               | NB1-j               |
| d85f37f01b54e59aaa9b5194385dd433  | Bacteria      | Myxococcota       | bacteriap25         | bacteriap25         | bacteriap25         |
| dbefeb8a83c0e0cc2b9f8490f851e228  | Bacteria      | Proteobacteria    | Gammaproteobacteria | MBMPE27             | MBMPE27             |
| e01197bd4113e43decca0c3663e67f43  | Bacteria      | Bacteroidota      | Bacteroidia         | Cytophagales        | Cyclobacteriaceae   |
| e5f6e798a12918409bf6fc6ae3bc509e  | Archaea       | Crenarchaeota     | Nitrososphaeria     | Nitrosopumilales    | Nitrosopumilaceae   |
| e6a468f5c87528890754b9440ce9c39b  | Bacteria      | Bacteroidota      | Bacteroidia         | Cytophagales        | Cyclobacteriaceae   |
| e7b305d64864e6b6342640ef7cd475c4  | Bacteria      | NB1-j             | NB1-j               | NB1-j               | NB1-j               |
| ed3e7227f2817d733a9c26b6a87af048  | Bacteria      | Proteobacteria    | Alphaproteobacteria | Kiloniellales       | Kiloniellaceae      |
| ef63eb3f3f5a1749e2025c173dd78b1c  | Bacteria      | Planctomycetota   | Planctomycetes      | Pirellulales        | Pirellulaceae       |
| f33200e3502fdd17e126d1333fb55140  | Bacteria      | Bacteroidota      | Bacteroidia         | Flavobacteriales    | Crocinitomicaceae   |
| <b>Subsurface Core Microbiome</b> |               |                   |                     |                     |                     |
| 88ece184badcd461a1c452b9168238dd  | Bacteria      | Proteobacteria    | Alphaproteobacteria | Rhizobiales         | Hyphomicrobiaceae   |
| d42457886a830872cbbecf93f40e7b7d  | Bacteria      | Methylomirabilota | Methylomirabilia    | Methylomirabilales  | Methylomirabilaceae |



**Table S6.** List of MAGs recovered from the sediment samples, their taxonomic classification and quality parameters.

| MAGs         | Completeness (%) | Contamination (%) | Contig number | CG %   | N50  | Total length | GTDB-TK taxonomy                                                                              |
|--------------|------------------|-------------------|---------------|--------|------|--------------|-----------------------------------------------------------------------------------------------|
| SB MAG 00001 | 94.244           | 2.158             | 403           | 58.583 | 7968 | 2397160      | Bacteria; Methyloirabilota; Methyloirabilis, CPS1-5; CPS1-5                                   |
| SB MAG 00002 | 90.647           | 2.877             | 323           | 57.953 | 9268 | 2379090      | Bacteria; Nitrospirota; Nitrospira; Nitrospirales; Nitrospiraceae                             |
| SB MAG 00003 | 83.453           | 1.438             | 520           | 44.422 | 3070 | 1518180      | Bacteria; Proteobacteria; Gammaproteobacteria; Burkholderiales; Nitrosomonadaceae; GCA2721545 |
| SB MAG 00004 | 82.014           | 2.158             | 928           | 57.198 | 3165 | 2823452      | Bacteria; Proteobacteria; Gammaproteobacteria; Burkholderiales; Nitrosomonadaceae; GCA2721545 |
| SB MAG 00005 | 76.978           | 2.158             | 2,328         | 54.233 | 2573 | 5918495      | Bacteria; Proteobacteria; Gammaproteobacteria; GCA-2729495; GCA-2729495; GCA2729495           |
| SB MAG 00006 | 72.661           | 0.719             | 1049          | 63.004 | 3646 | 3537226      | Bacteria; Proteobacteria; Gammaproteobacteria; HK1                                            |
| SB MAG 00007 | 71.942           | 2.877             | 515           | 40.507 | 2826 | 3537226      | Bacteria; Proteobacteria; Gammaproteobacteria; UBA4486; UBA4486                               |
| SB MAG 00008 | 71.942           | 2.877             | 2024          | 53.166 | 2000 | 4170056      | Bacteria; Binatota; Binatia; UBA9968                                                          |
| SB MAG 00009 | 66.906           | 2.158             | 1984          | 62.711 | 2381 | 4744342      | Bacteria; Proteobacteria; Gammaproteobacteria; HK1                                            |
| SB MAG 00010 | 63309            | 2.158             | 841           | 66363  | 1957 | 1698391      | Bacteria; Proteobacteria; Alphaproteobacteria; Kiloniellales                                  |
| SB MAG 00011 | 60.431           | 2.158             | 2299          | 57.615 | 1864 | 4436461      | Bacteria; Proteobacteria; Gammaproteobacteria; Woeseiales; Woeseiaceae;                       |
| SB MAG 00012 | 58.992           | 1.438             | 963           | 66.436 | 2056 | 2034755      | Bacteria; Proteobacteria; Alphaproteobacteria; Kiloniellales; Kiloniellaceae;                 |
| SB MAG 00013 | 57.554           | 0.000             | 455           | 34.752 | 2205 | 1040817      | Bacteria; Dadabacteria; UBA1144                                                               |
| SB MAG 00014 | 53.956           | 1.438             | 3617          | 59.202 | 1889 | 7172570      | Bacteria; Tectomicrobia; Entotheonellia; Entotheonellales                                     |
| SB MAG 00015 | 50.617           | 2.469             | 235           | 34.209 | 1951 | 475213       | Archaea; Crenarchaeota; Nitrososphaeria; Nitrososphaerales; Nitrosopumilaceae;                |
| SB MAG 00016 | 51.234           | 3.703             | 336           | 33.915 | 2171 | 751328       | Archaea; Crenarchaeota; Nitrososphaeria; Nitrososphaerales; Nitrosopumilaceae                 |
| SB MAG 00017 | 50.000           | 2.469             | 172           | 33.744 | 3972 | 608712       | Archaea; Crenarchaeota; Nitrososphaeria; Nitrososphaerales; Nitrosopumilaceae; CSP1-1         |
| SB MAG 00018 | 50.000           | 4.321             | 370           | 33.771 | 2163 | 819900       | Archaea; Crenarchaeota; Nitrososphaeria; Nitrososphaerales; Nitrosopumilaceae                 |
| SB MAG 00019 | 46.762           | 2.158             | 2042          | 66.128 | 1817 | 3842992      | Bacteria; Myxococcota; UBA9160                                                                |
| SB MAG 00020 | 46.043           | 2.877             | 638           | 66.476 | 1975 | 1299393      | Bacteria; Proteobacteria; Alphaproteobacteria; Kiloniellales                                  |
| SB MAG 00021 | 43.884           | 1.438             | 691           | 48.608 | 1851 | 1322597      | Bacteria; Nitrospirota; Nitrospira; Nitrospirales; UBA8639; UBA8639                           |
| SB MAG 00022 | 43.827           | 3.086             | 246           | 34.212 | 2190 | 557612       | Archaea; Crenarchaeota; Nitrososphaeria; Nitrososphaerales; Nitrosopumilaceae                 |
| SB MAG 00023 | 40.287           | 1.438             | 1466          | 65.685 | 1804 | 2742135      | Bacteria; Proteobacteria; Alphaproteobacteria; UBA6615                                        |
| SB MAG 00024 | 40.123           | 1.851             | 128           | 34.001 | 3182 | 379099       | Archaea; Crenarchaeota; Nitrososphaeria; Nitrososphaerales; Nitrosopumilaceae; CSP1-1         |
| SB MAG 00025 | 40.123           | 1.851             | 261           | 33.521 | 2319 | 615250       | Archaea; Crenarchaeota; Nitrososphaeria; Nitrososphaerales; Nitrosopumilaceae; CSP1-1         |
| SB MAG 00026 | 38.848           | 0.719             | 608           | 56.672 | 2073 | 1308546      | Bacteria; Proteobacteria; Gammaproteobacteria; Woeseiales; Woeseiaceae; SZUA-117              |
| SB MAG 00027 | 40.123           | 3.703             | 411           | 33.581 | 2092 | 892541       | Archaea; Crenarchaeota; Nitrososphaeria; Nitrososphaerales; Nitrosopumilaceae                 |
| SB MAG 00028 | 40.123           | 4.938             | 377           | 34.542 | 1974 | 767898       | Archaea; Crenarchaeota; Nitrososphaeria; Nitrososphaerales; Nitrosopumilaceae                 |
| SB MAG 00029 | 34.532           | 0.000             | 569           | 53.863 | 2121 | 1243523      | Bacteria; Proteobacteria; Gammaproteobacteria; Acidiferrobacteriales; SPGG2; SPGG2;           |
| SB MAG 00030 | 37.654           | 3.703             | 341           | 33.619 | 1973 | 704382       | Archaea; Crenarchaeota; Nitrososphaeria; Nitrososphaerales; Nitrosopumilaceae                 |
| SB MAG 00031 | 35.802           | 3.703             | 214           | 33.417 | 2826 | 579426       | Archaea; Crenarchaeota; Nitrososphaeria; Nitrososphaerales; Nitrosopumilaceae; CSP1-1         |
| SB MAG 00032 | 30.246           | 1.234             | 184           | 33.889 | 2364 | 478985       | Archaea; Crenarchaeota; Nitrososphaeria; Nitrososphaerales; Nitrosopumilaceae; CSP1-1         |
| SB MAG 00033 | 30.246           | 1.851             | 120           | 34.555 | 3043 | 346885       | Archaea; Crenarchaeota; Nitrososphaeria; Nitrososphaerales; Nitrosopumilaceae                 |
| SB MAG 00034 | 30.864           | 6.172             | 382           | 33.449 | 2081 | 814736       | Archaea; Crenarchaeota; Nitrososphaeria; Nitrososphaerales; Nitrosopumilaceae                 |

**Table S7.** Information on the sequences retrieved from Silva v138 database and used to build the phylogenetic tree.

| Access number | Isolation source                                                                                   | Location information                                        | Alignment Identity | DOI                                     |
|---------------|----------------------------------------------------------------------------------------------------|-------------------------------------------------------------|--------------------|-----------------------------------------|
| AF317743      | Cave-freshwater samples                                                                            | Nullarbor region of Australia                               | 100%               | DOI: 10.1046/j.1462-2920.2001.00187.x   |
| AM991193      | Karst spring water - groundwater                                                                   | Switzerland:Yverdon-les-Bains                               | 87.82%             | Unpublished                             |
| DQ906791      | Subsurface soil                                                                                    | Oman                                                        | 87.91%             | Unpublished                             |
| EU335141      | Saturated C horizon soil aggregate - Soil                                                          | Melton Branch Watershed, Oak Ridge, TN.                     | 94.83%             | DOI: 10.1128/AEM.01787-07               |
| EU335144      | Saturated C horizon soil aggregate                                                                 | Melton Branch Watershed, Oak Ridge, TN.                     | 87.66%             | DOI: 10.1128/AEM.01787-07               |
| EU491346      | seafloor lavas from Hawai'i South Point X3                                                         | East Pacific Rise (EPR)                                     | 95.14%             | DOI: 10.1038/nature06899                |
| EU491462      | Seafloor lavas from Hawai'i South Point X3                                                         | East Pacific Rise (EPR)                                     | 94.04%             | DOI: 10.1038/nature06899                |
| FJ205359      | Deep marine sediments, depth:2725m                                                                 | Pacific Ocean: Lau Basin                                    | 94.04%             | Unpublished                             |
| GU363024      | marine sediment from the South China Sea                                                           | South China Sea                                             | 97.11%             | Unpublished                             |
| HM186756      | Saturated zone of the Hanford Site 300 Area subsurface - River sediment                            | Hanford Site 300 Area near Richland, Washington state (USA) | 93.79%             | DOI: 10.1111 / j.1462-2920.2011.02659.x |
| HM186887      | Saturated zone of the Hanford Site 300 Area subsurface - River sediment                            | Washington - EUA                                            | 97.13%             | DOI: 10.1111 / j.1462-2920.2011.02659.x |
| HM186966      | Saturated zone of the Hanford Site 300 Area subsurface - River sediment                            | Washington - EUA                                            | 94,29%             | DOI: 10.1111 / j.1462-2920.2011.02659.x |
| HM187212      | Saturated zone of the Hanford Site 300 Area subsurface - River sediment                            | Washington - EUA                                            | 87,88%             | DOI: 10.1111 / j.1462-2920.2011.02659.x |
| HM187376      | Saturated zone of the Hanford Site 300 Area subsurface - River sediment                            | Washington - EUA                                            | 91,11%             | DOI: 10.1111 / j.1462-2920.2011.02659.x |
| JF265987      | White microbial mat from lava tube wall - Cave                                                     | Portugal: Gruta da Malha, Terceira, Azores                  | 94.90 %            | DOI: 10.1089 / ast.2010.0562            |
| JF747701      | Underwater Cave - hypersaline groundwater                                                          | Dominican Republic - Manantial del Toro                     | 95.14 %            | Unpublished                             |
| JF747703      | Underwater Cave - hypersaline groundwater                                                          | Dominican Republic - Manantial del Toro                     | 94.82 %            | Unpublished                             |
| JF809696      | Hypersaline basin - Deep-Sea Hypersaline Sediments                                                 | Medea - Mediterranean Sea                                   | 94.23 %            | DOI: 10.1264 / jsme2.ME12045            |
| JN229988      | Subseafloor sediment deeply buried coral carbonates and sediments                                  | Porcupine Seabight – Atlantic Ocean                         | 95.52 %            | Unpublished                             |
| JN615730      | Tan microbial mat from lava tube wall - Cave                                                       | Gruta da Malha, Terceira, Azores - Portugal                 | 93.97 %            | Unpublished                             |
| JN701089      | Yellow microbial mat from lava tube wall- Cave                                                     | Gruta Madre de Deus Terceira, Azores - Portugal             | 97.83 %            | Unpublished                             |
| JN886867      | Carbonate sediments                                                                                | Southwest Indian Ridge                                      | 94.16 %            | Unpublished                             |
| JQ425959      | saline Soil layer (0-10 cm)                                                                        | Old Texcoco lake - Mexico                                   | 93.88 %            | Unpublished                             |
| JX222001      | Subsurface aquifer sediment                                                                        | USA:Rifle - Colorado                                        | 93.31 %            | DOI: 10.1111/j.1574-6941.2012.01363.x   |
| JX227602      | Sediment collected from station WS0902 deep-sea polymetallic nodules and the surrounding sediments | Clarion-Clipperton Fracture Zone – Pacific Ocean            | 95.34%             | DOI: 10.1016 / j.dsr.2013.05.004        |

| <b>Table S7. continuation</b> |                                                                            |                                   |                           |                                         |
|-------------------------------|----------------------------------------------------------------------------|-----------------------------------|---------------------------|-----------------------------------------|
| <b>Access number</b>          | <b>Isolation source</b>                                                    | <b>Location information</b>       | <b>Alignment Identity</b> | <b>DOI</b>                              |
| KM071663                      | Deep-sea hydrothermal vent sediments                                       | East Pacific Ocean                | 93.38 %                   | Unpublished                             |
| KM454246                      | Marine sediment                                                            | Maluku Strait - Indonesian        | 96.83 %                   | Unpublished                             |
| KT223295                      | Slope sediment - a depth of 1250 m                                         | Orca Basin - Gulf of Mexico       | 89.91 %                   | DOI: 10.30564 / jasn.v2i2.930           |
| KT223298                      | Slope sediment                                                             | Orca Basin - Gulf of Mexico       | 91.25%                    | Unpublished                             |
| KT748567                      | Seafloor basalt (3 km depth)                                               | Dorado Outcrop, East Pacific Rise | 93.19 %                   | DOI: 10.3389/fmicb.2015.01470           |
| KX172753                      | marine Sediment                                                            | Gulf of Mexico                    | 97.71 %                   | DOI: 10.3389/fmicb.2016.01384           |
| KY609420                      | Fe-Si-rich low-temperature hydrothermal precipitates                       | Lau Basin - Australia-Pacific     | 91.07 %                   | DOI: 10.1111 / j.1574-6941.2012.01367.x |
| LDXP01000044                  | Sediment at 5m depth aquifer adjacent to the Colorado River                | Rifle, Colorado - USA             | 84.87 %                   | DOI: 10.1111 / 1462-2920.12930          |
| LXTG01000049                  | Sediment sample at the water-sediment interface<br>Oxic Deep-Sea Sediments | Central gyre - Pacific Ocean      | 92.81 %                   | DOI: 10.1128/AEM.01023-16.              |

**Table S8.** List of genes used in the metabolic reconstruction model (Figure 5). Predicted protein, Kegg ID and method where the gene was detected are shown.

| Gene         | Predicted protein                                              | Kegg ID          | Detected by |           |              |
|--------------|----------------------------------------------------------------|------------------|-------------|-----------|--------------|
|              |                                                                |                  | DRAM        | Pangenome | HMMER Search |
| xoxF         | lanthanide-dependent methanol dehydrogenase                    | K23995           | x           | x         |              |
| mxkJ         | mxkJ protein                                                   | K16254           | x           |           |              |
| fae          | 5,6,7,8-tetrahydromethanopterin hydrolyase                     | K10713           |             | x         | x            |
| fdoH         | formate dehydrogenase iron-sulfur subunit                      | K00124           |             | x         |              |
| mtdB         | methylene-tetrahydromethanopterin dehydrogenase                | K10714           | x           | x         |              |
| mch          | methenyl-tetrahydromethanopterin cyclohydrolase                | K01499           | x           | x         | x            |
| ftf          | formylmethanofuran-tetrahydromethanopterin N-formyltransferase | K00672           | x           | x         | x            |
| fwdA<br>fmdA | formylmethanofuran dehydrogenase                               | K00200           |             | x         |              |
| npd          | nitronate monooxygenase                                        | K00459           | x           | x         |              |
| hao          | hydroxylamine dehydrogenase                                    | K10535           | x           | x         |              |
| narGH        | nitrate reductase                                              | K00370<br>K00371 | x           | x         | x            |
| nxrAB        | nitrite oxidoreductase                                         | K00370<br>K00371 |             |           | x            |
| glnA         | glutamine synthetase                                           | K01915           | x           | x         |              |
| gltB         | glutamate synthase (NADPH) large chain                         | K00265           |             | x         |              |
| doxD         | thiosulfate dehydrogenase (quinone) large subunit              | K16937           | x           |           |              |
| soxC         | sulfane dehydrogenase                                          | K17225           | x           |           | x            |
| sat          | sulfate adenylyltransferase                                    | K00958           |             | x         | x            |
| cysN         | sulfate adenylyltransferase                                    | K00956           |             |           | x            |

**Table S8.** continuation

| <b>Gene</b> | <b>Predicted protein</b>                               | <b>Kegg ID</b>             | <b>Detected by</b> |                  |                     |
|-------------|--------------------------------------------------------|----------------------------|--------------------|------------------|---------------------|
| cysC        | adenylyl-sulfate kinase / sulfate adenylyltransferase  | K00860                     |                    | x                | x                   |
| sir         | sulfite reductase (ferredoxin)                         | K00392                     |                    | x                |                     |
| cysK        | cysteine synthase                                      | K01738                     | x                  | x                |                     |
|             |                                                        |                            | <b>DRAM</b>        | <b>Pangenome</b> | <b>HMMER Search</b> |
| trK         | potassium uptake protein                               | K03498<br>K03499           | x                  | x                |                     |
| otsA        | trehalose 6-phosphate synthase                         | K00697                     | x                  |                  |                     |
| otsB        | trehalose 6-phosphate phosphatase                      | K01087                     | x                  | x                |                     |
| ybiO        | moderate conductance mechanosensitive channel          | K22044                     | x                  | x                |                     |
| phaC        | poly[(R)-3-hydroxyalkanoate] polymerase                | K03821                     | x                  | x                |                     |
| yiaO        | TRAP-type transport system periplasmic protein         | K21395                     | x                  | x                |                     |
| opuABC      | osmoprotectant transport system                        | K05847<br>K05846<br>K05845 | x                  | x                |                     |
| cspA        | cold shock protein                                     | K03704                     | x                  | x                |                     |
| rhlB        | ATP-dependent RNA helicase                             | K03732                     | x                  | x                |                     |
| ppx         | exopolyphosphatase                                     | K01524                     | x                  | x                |                     |
| ppk         | polyphosphate kinase                                   | K00937                     | x                  | x                |                     |
| phnD        | phosphonate transport system substrate-binding protein | K02044                     | x                  |                  |                     |
| afuABC      | iron(III) transport system                             | K02012<br>K02011<br>K02010 | x                  | x                |                     |
| tupAC       | tungstate transport system                             | K05772<br>K06857           | x                  | x                |                     |

| <b>Table S8.</b> continuation |                                                       |                                                |                    |                  |                     |
|-------------------------------|-------------------------------------------------------|------------------------------------------------|--------------------|------------------|---------------------|
| <b>Gene</b>                   | <b>Predicted protein</b>                              | <b>Kegg ID</b>                                 | <b>Detected by</b> |                  |                     |
| lolDCE                        | lipoprotein-releasing system                          | K09810<br>K09808                               | x                  | x                |                     |
| lptBFG                        | lipopolysaccharide export system                      | K06861<br>K07091<br>K11720                     | x                  | x                |                     |
|                               |                                                       |                                                |                    |                  |                     |
|                               |                                                       |                                                |                    |                  |                     |
|                               |                                                       |                                                | <b>DRAM</b>        | <b>Pangenome</b> | <b>HMMER Search</b> |
| mlaCDEF                       | phospholipid transport system                         | K07323<br>K02067<br>K02066<br>K02065           | x                  | x                |                     |
| nodJ                          | lipooligosaccharide transport system permease protein | K09694                                         | x                  | x                |                     |
| livFGHKM                      | branched-chain amino acid transport system            | K01996<br>K01995<br>K01997<br>K01999<br>K01998 | x                  | x                |                     |
